# Supplementary material for: Identification of a large protein network involved in epigenetic transmission in replicating DNA of embryonic stem cells
Source: PubMed Central journal article supplement (PMC4066787; doi:10.1093/nar/gku374), 2014-05-22
Supplement: supp_gku374_nar-00461-h-2014-File009.pdf [file supp_gku374_nar-00461-h-2014-File009.pdf]

## **Supplemental Information**

### **Identification of a large protein network involved in DNA fidelity and epigenetic transmission in replicating DNA of embryonic stem cells**

Sergi Aranda, Dorothea Rutishauser and Patrik Ernfors

#### **INVENTORY OF SUPPLEMENTAL INFORMATION**

##### **SUPPLEMENTAL DATA**

Figure S1, related to Figure 1.

Figure S2, related to Figure 1.

Figure S3, related to Figure 2.

Figure S4, related to Figure 2.

Figure S5, related to Figure 4.

Table S1, Master Table for iPOND-MS in ESCs. (Available as Excel file)

Table S2, HDAC1 interacting mass spectrometry data. (Available as Excel file)

Table S3, List of antibodies used in this study

##### **SUPPLEMENTAL MATERIALS AND METHODS**

##### **SUPPLEMENTAL REFERENCES**

**SUPPLEMENTAL DATA**

Figure S1 (Aranda et al.)

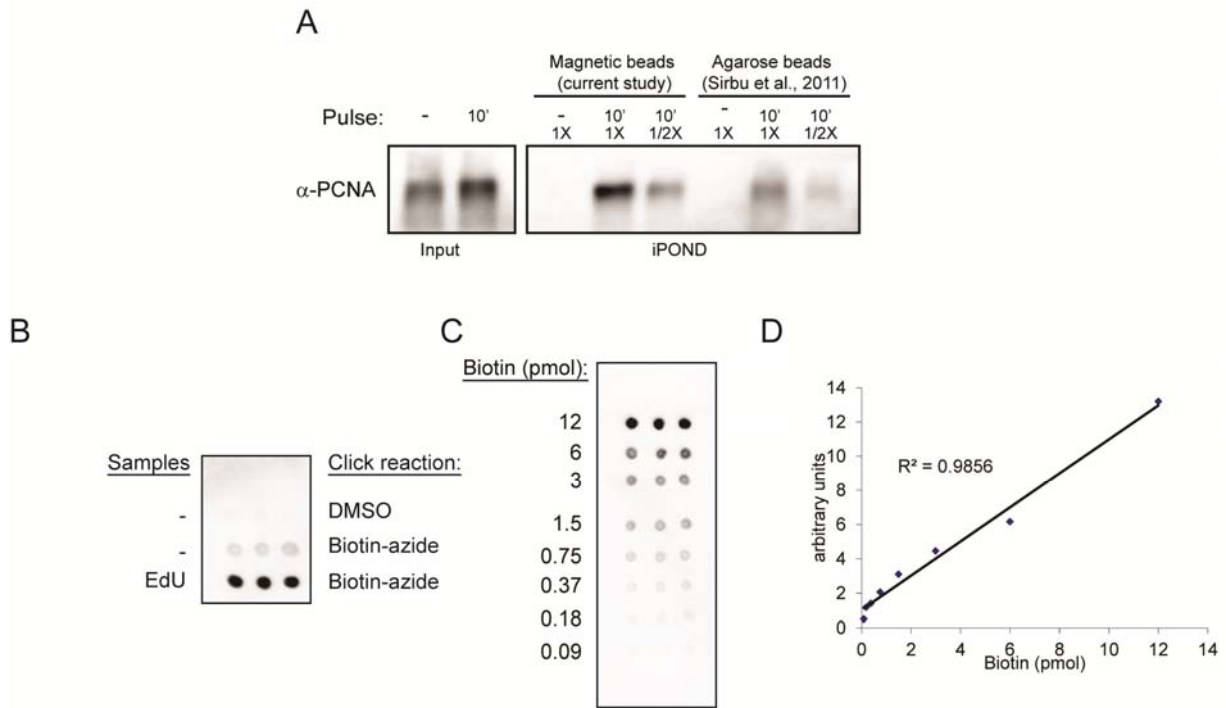

**Figure S1.** Related to Figure 1. **(A)** Comparison of protein isolation on nascent DNA using magnetic beads or agarose beads. Input (Inp) and the isolated proteins on nascent DNA (iPOND), using either magnetic or agarose streptavidin beads, from ESCs non-pulsed (-, control) and pulsed 10 minutes with EdU were analysed by Western blot using an antibody against PCNA. Note the greater efficiency of protein isolation by using magnetic beads. **(B)** Non-labelled and EdU-labelled ESCs were processed as indicated in the iPOND procedure. To assess the incorporation of biotin in the samples, sonicated samples were dot blotted onto nitrocellulose membrane in triplicates and incubated with HRP-streptavidin. **(C)** Two-fold serial dilutions of a biotinylated oligonucleotide were dot blotted onto nitrocellulose membrane in triplicates and hybridized with HRP-streptavidin. **(D)** The graph shows the quantification for the two-fold serial dilutions of the biotinylated oligonucleotide shown in C.

Figure S2 (Aranda et al.)

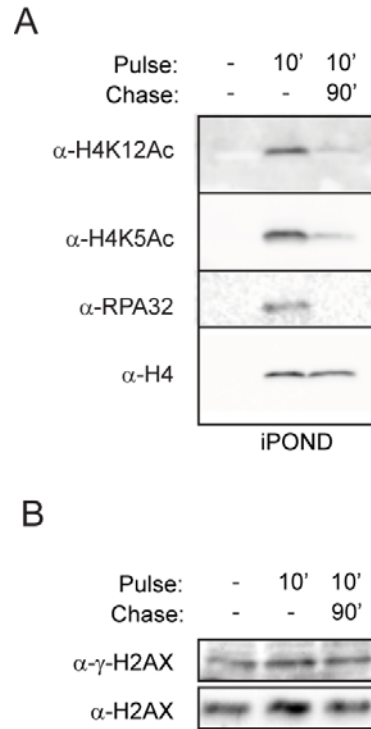

**Figure S2.** Related to Figure 1. **(A)** ESCs were incubated with EdU as indicated. The iPOND samples were analysed by Western blot using the indicated antibodies. **(B)** ESCs were incubated with EdU as indicated. Total cell lysates were analysed by Western blot using the indicated antibodies.

Figure S3 (Aranda et al.)

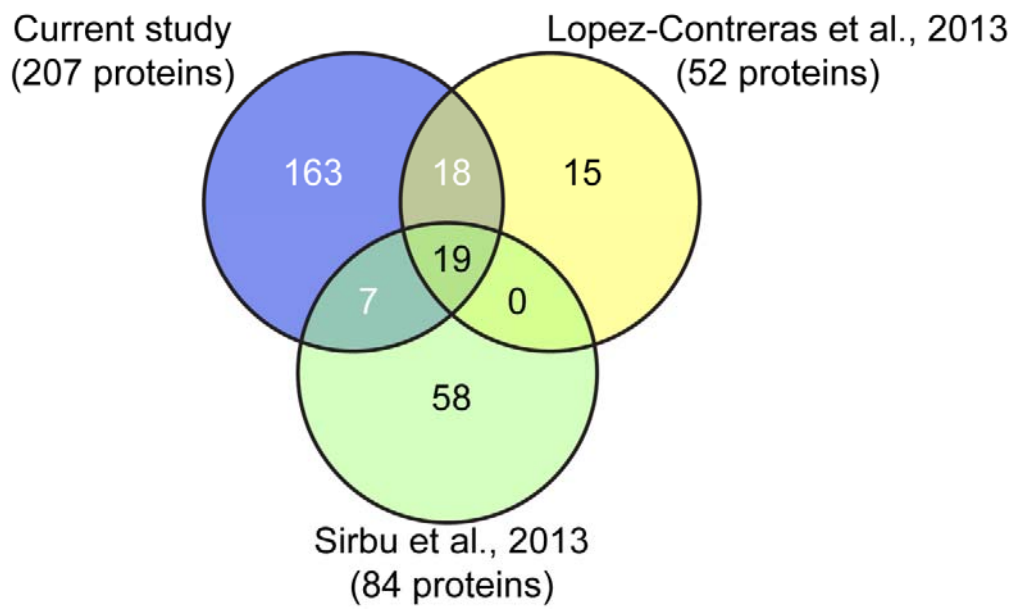

**Figure S3.** Related to Figure 2. Venn diagram indicating the number of proteins overlapping among the data from the current study, the data from Fernandez-Capetillo's group (Lopez-Contreras et al., 2013, ref#1) and the data from Cortez's group (Sirbu et al., 2013, ref#2). The total number of proteins identified in each study by iPOND at nascent DNA is indicated in brackets.

Figure S4 (Aranda et al.)

| Replisome                            |                                                  |      |        |  |
|--------------------------------------|--------------------------------------------------|------|--------|--|
| Symbol                               | Protein Name                                     | ESCs | NIH3T3 |  |
| <b>DNA primase</b>                   |                                                  |      |        |  |
| Pola1                                | DNA polymerase alpha catalytic subunit           | +    | +      |  |
| Pola2                                | DNA polymerase alpha subunit B                   | +    | +      |  |
| Prim2                                | DNA primase large subunit                        | +    | +      |  |
| <b>DNA polymerases</b>               |                                                  |      |        |  |
| Pold1                                | DNA polymerase delta catalytic subunit           | +    | +      |  |
| Pold2                                | DNA polymerase delta subunit 2                   | +    |        |  |
| Pold3                                | DNA polymerase delta subunit 3                   | +    |        |  |
| Pole                                 | DNA polymerase epsilon catalytic subunit A       | +    | +      |  |
| <b>Clamp loader complex</b>          |                                                  |      |        |  |
| Rfc1                                 | Replication factor C subunit 1                   | +    | +      |  |
| Rfc2                                 | Replication factor C subunit 2                   | +    | +      |  |
| Rfc3                                 | Replication factor C subunit 3                   | +    | +      |  |
| Rfc4                                 | Replication factor C subunit 4                   | +    | +      |  |
| Rfc5                                 | Replication factor C subunit 5                   | +    | +      |  |
| <b>Replisome associated proteins</b> |                                                  |      |        |  |
| Lig1                                 | DNA ligase 1                                     | +    | +      |  |
| Lig3                                 | DNA ligase 3                                     | +    |        |  |
| Paf                                  | PCNA-associated factor                           | +    |        |  |
| Timeless                             | Protein timeless homolog                         | +    |        |  |
| Fen1                                 | Flap endonuclease 1                              | +    |        |  |
| Gins1                                | DNA replication complex GINS protein PSF1        | +    |        |  |
| Wdhd1/And1                           | WD repeat and HMG-box DNA-binding protein 1      | +    |        |  |
| Rpa1                                 | Replication protein A 70 kDa DNA-binding subunit | +    | +      |  |
| Top2b                                | DNA topoisomerase 2-beta                         | +    | +      |  |
| Pcna                                 | Proliferating cell nuclear antigen               | +    | +      |  |
| <b>MCM complex</b>                   |                                                  |      |        |  |
| Mcm2                                 | DNA replication licensing factor MCM2            | +    | +      |  |
| Mcm3                                 | DNA replication licensing factor MCM3            | +    | +      |  |
| Mcm4                                 | DNA replication licensing factor MCM4            | +    |        |  |
| Mcm6                                 | DNA replication licensing factor MCM6            | +    | +      |  |
| Mcm7                                 | DNA replication licensing factor MCM7            | +    | +      |  |
| <b>Histone chaperones</b>            |                                                  |      |        |  |
| Chaf1a                               | Chromatin assembly factor 1 subunit A            | +    |        |  |
| Chaf1b                               | Chromatin assembly factor 1 subunit B            | +    | +      |  |
| Asf1                                 | Histone chaperone ASF1A                          | +    |        |  |
| Spt16h                               | FACT complex subunit SPT16                       | +    | +      |  |
| Ssrp1                                | FACT complex subunit SSRP1                       | +    | +      |  |
| <b>Nucleoside diphosphate kinase</b> |                                                  |      |        |  |
| Nme1                                 | Nucleoside diphosphate kinase A                  | +    |        |  |
| Nme2                                 | Nucleoside diphosphate kinase B                  | +    | +      |  |

**Figure S4.** Related to Figure 2. Proteins identified in the iPOND proteomic analysis in ESCs (red) and fibroblasts (NIH3T3, green) that belongs to the core replisome module. + indicates presence of the protein.

Figure S5 (Aranda et al.)

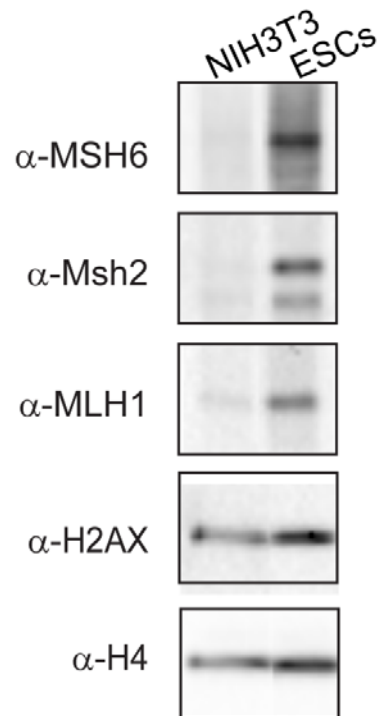

**Figure S5.** Related to Figure 3. Cell extracts from the fibroblast cell line NIH3T3 and ESCs were analysed by Western blot with the indicated antibodies.

Figure S6 (Aranda et al.)

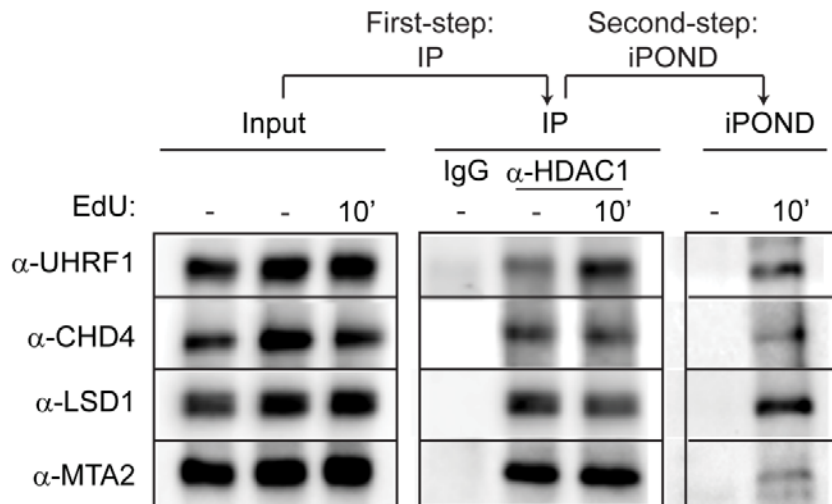

**Figure S6.** Related to Figure 4. Extracts from ESCs pulsed with EdU were immunoprecipitated with control immunoglobulins (IgG) or an anti-HDAC1 antibody (First -step: IP). The precipitates were eluted with a competitor peptide and re-purified using streptavidin magnetic beads (Second-step: iPOND). Samples were analysed by Western blot with the indicated antibodies.

Figure S7 (Aranda et al.)

A

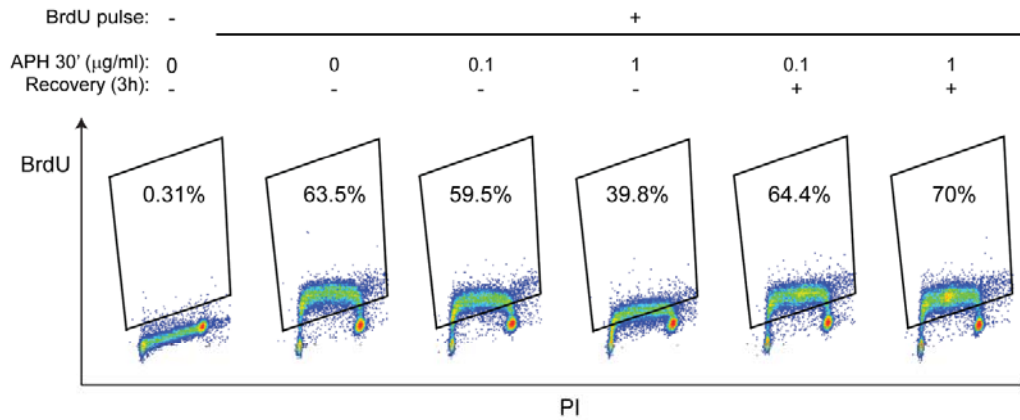

B

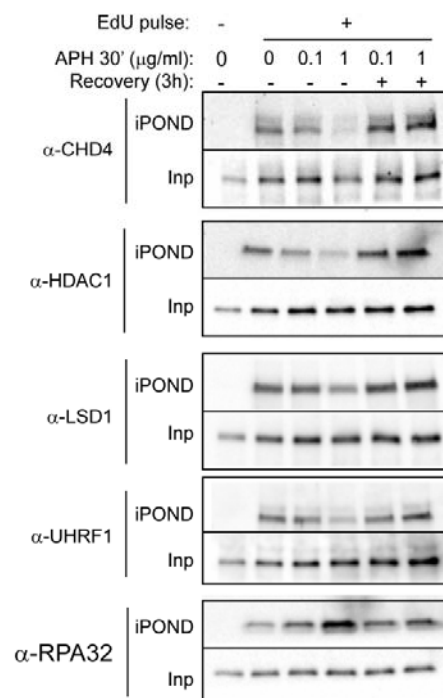

**Figure S7.** Related to Figure 4. (A) ESCs were treated 30 minutes with 0.1 or 1  $\mu\text{g/ml}$  of aphidicolin (APH) as indicated. After the treatment, aphidicolin was removed from the media,



cells were washed with fresh media and incubated for additional 3 hours (Recovery). At the end of each treatment ESCs were pulsed for 10 minutes with BrdU. Cells were stained with propidium iodide and an FITC conjugated anti-BrdU antibody and were analysed by flow cytometry. Numbers indicate the percent of cells gated as BrdU positive cells in S-phase. Note the reduction of BrdU incorporation after the aphidicolin treatment and the recovery after aphidicolin removal. **(B)** EdU normalized samples from ESCs treated as in **(A)**, but pulsed with EdU, were used in iPOND and both inputs and iPOND samples were analyzed by Western blot with the indicated antibodies.

**Table S3: List of antibodies used in the study.**

| Primary Antibody                        | Host   | Source                   | Catalog No. | Usage   | Dilution      |
|-----------------------------------------|--------|--------------------------|-------------|---------|---------------|
| FITC-BrdU                               | Mouse  | BD Bioscience            | 556028      | FACS    | 1:50          |
| Nanog                                   | Rabbit | Abcam                    | ab80892     | IF      | 1:250         |
| Nestin                                  | Mouse  | Abcam                    | ab6142      | IF      | 1:500         |
| Histone H2AX                            | Rabbit | Abcam                    | ab11175     | WB      | 1:5,000       |
| CHD4                                    | Rabbit | Abcam                    | ab72418     | WB      | 1:1,000       |
| MTA2                                    | Rabbit | Abcam                    | ab8106      | WB      | 1:4,000       |
| HDAC1                                   | Mouse  | Millipore                | 05-100      | WB      | 1:1,000       |
| HDAC1                                   | Goat   | Santa Cruz Biotechnology | sc-6298     | IP      | 10 mg         |
| UHRF1                                   | Rabbit | Santa Cruz Biotechnology | sc-98817    | WB/IP   | 1:1,000       |
| LSD1                                    | Rabbit | Abcam                    | ab17721     | WB      | 1:1,000       |
| PCNA                                    | Rabbit | Abcam                    | ab18197     | WB      | 1:2,000       |
| RPA32                                   | Rat    | Cell Signaling           | 2208        | WB/IF   | 1:2,000/1:250 |
| MLH1                                    | Rabbit | Epitomics                | 2786-1      | WB      | 1:1,000       |
| MSH2                                    | Rabbit | Epitomics                | 2848-1      | WB      | 1:1,000       |
| MSH6                                    | Rabbit | Epitomics                | 2846-1      | WB      | 1:1,000       |
| Histone H3                              | Rabbit | Abcam                    | ab1791      | WB      | 1:20,000      |
| Histone H4                              | Rabbit | Millipore                | 05-858      | WB      | 1:10,000      |
| H4K12Ac                                 | Rabbit | Millipore                | 07-595      | WB      | 1:5,000       |
| H4K5Ac                                  | Rabbit | Millipore                | 07-327      | WB      | 1:5,000       |
| H3K9Ac                                  | Rabbit | Cell Signaling           | 9671        | WB      | 1:1,000       |
| H3K9me1                                 | Rabbit | Millipore                | 07-450      | WB      | 1:1,000       |
| H3K9me3                                 | Rabbit | Abcam                    | ab8898      | WB      | 1:2,000       |
| H3K4Ac                                  | Rabbit | Active Motif             | 39382       | WB      | 1:1,000       |
| H3K4me3                                 | Rabbit | Diagenode                | pAb-003     | WB      | 1:1,000       |
| H3K27Ac                                 | Rabbit | Active Motif             | 39136       | WB/ChIP | 1:1,000       |
| H3K27me3                                | Rabbit | Millipore                | 07-449      | WB      | 1:1,000       |
| gamma-H2AX                              | Mouse  | Abcam                    | ab22551     | IF/FACS | 1:1,000       |
| GAPDH                                   | Mouse  | SIGMA                    | G8795       | WB      | 1:100,000     |
| <b>Secondary Antibody</b>               |        |                          |             |         |               |
| Anti-rabbit IgG (Conformation Specific) | Mouse  | Cell signaling           | 3678        | WB      | 1:1,000       |
| HRP anti-Mouse IgG                      | Goat   | SIGMA                    | A-4416      | WB      | 1:2,000       |
| HRP anti-Rabbit IgG                     | Goat   | SIGMA                    | A-6667      | WB      | 1:2,000       |
| HRP anti-Rat IgG                        | Goat   | SIGMA                    | A-9037      | WB      | 1:2,000       |
| anti-mouse alexa 555                    | Donkey | Molecular Probes         | A31570      | IF      | 1:400         |
| anti-rat alexa 488                      | Donkey | Molecular Probes         | A-21208     | IF      | 1:400         |

## **SUPPLEMENTAL MATERIALS AND METHODS**

### **FACS**

Cells were harvested, fixed with ethanol and stained with a mouse fluorescein isothiocyanate (FITC)-conjugated anti-5-bromo-2'-deoxyuridine (BrdU) antibody. DNA was stained with propidium iodide (Sigma). The cells were sorted using FACScan (Becton Dickinson), and the data were analysed using FlowJo 7.5.5.

### **Immunofluorescence**

The cells were pulsed for 10 minutes with 10  $\mu$ M EdU (Invitrogen), then fixed in 4% paraformaldehyde for 10 min, incubated 30 min in blocking buffer (1% bovine serum albumin, 10% normal donkey serum, 0.1 % Triton X-100 in PBS). Then cells were stained with mouse anti-Nanog and rabbit anti-Nestin antibodies. Donkey Alexa-488 anti-mouse and Alexa-555 anti-rabbit were used as secondary antibodies. Click reaction (100 mM Tris-HCl [pH 8], 2 mM  $\text{CuSO}_4$ , 2  $\mu$ M 647 Alexa-azide [Invitrogen] and 100 mM  $\text{C}_6\text{H}_8\text{O}_6$  [ascorbic acid]) was performed for 30 min at RT. Samples were analysed using an Olympus FV1000 Confocal microscope, and optical sections were captured.

### **Dot-blot analysis**

The samples were spotted in 1- $\mu$ l dots onto a nylon membrane (Hybond-N+, Amersham) in triplicate, air-dried, and cross-linked (Stratalinker 1800, Stratagene, 0.4 J/cm<sup>2</sup>). Membranes were incubated with horseradish peroxidase (HRP)-conjugated Avidin (1:1000, Invitrogen) for 30 min at RT. The data were quantified using Image Lab software (v4.0.1; Bio-Rad). A serially diluted 5'-biotinylated oligonucleotide served as standard (5'-CTCATAGCTCACGCTGTAGGTATCTCAGTTCGG-3').

### **DNA purification**

The sonicated samples were reverse cross-linked by dilution in digestion buffer (250 mM NaCl and 50 ng/ml RNase A) overnight at 65°C and digested with proteinase K (0.1 mg/ml). The DNA was recovered by phenol/chloroform extraction and ethanol precipitation.

### **Immunoprecipitation in the presence of ethidium bromide**

Cells were processed using the two-step (IP-iPOND) purification procedure, and 100 µg/ml ethidium bromide was added to the sonicated material, followed by incubation for 30 min at 4°C. The supernatant was collected by centrifugation (15,000xg, 20 min at 4°C) and incubated with 3 µg of either a rabbit anti-UHRF1 or rabbit IgG immunoglobulins overnight at 4°C. The immunocomplexes were incubated 1 h at RT with 25 µl Dynabeads Protein A (Invitrogen), washed 3 times with PBS + 2 mg/ml single strand DNA (SIGMA), and resuspended in Laemmli buffer.

### **In-gel digestion of silver-stained gel bands**

The iPOND samples were resolved by SDS-PAGE, and the gels were silver-stained (Pierce). Four independent isolations of nascent chromatin from ESCs, with their corresponding negative control, and three isolations of mature chromatin after a 90-min chase were performed (Experiment I, II, III, IV). Two independent nascent chromatin isolations were performed from NIH3T3 fibroblasts cells (Experiment V and VI). Each gel lane was divided into 24 bands, which were de-stained in 50 mM ammonium bicarbonate and 50% acetonitrile. Tryptic digestion was performed by a liquid-handling robot (MultiProbe II, Perkin Elmer), including protein reduction in 10 mM DTT and alkylation in 55 mM iodoacetamide. Gel pieces were dehydrated in 100% acetonitrile, trypsin was added to a final concentration of 13 ng/µl, and the pieces were digested for 5 h at 37°C. Extracted peptides from consecutive bands were pooled according to their protein levels, resulting in eight pools for each lane.

### **Liquid chromatography tandem mass spectrometry**

Samples from experiment I were analyzed using a Q-TOF Premier API instrument (Water, Milford, MA, USA) coupled to a Waters NanoAquity UPLC. Peptides were first desalted for 1 min on a Symmetry C18 trapping column (5 µm, 180 µm x 2 cm) and separated on an analytical BEH C18 column (1.7 µm, 75 µm i.d. x 15 cm). Peptides were eluted with a linear 90 min gradient from 3-40% ACN at a flow rate of 300 nl/min. Data was acquired in data-dependent mode over a mass range of m/z 300 to m/z 2000 by automated switching between MS and MS/MS. The collision energy was altered between 25 and 45 eV depending on the mass and

charge state. Scan speed was 0.9 s/spectra with 0.1 interscan time and lock mass reference was applied (Glu fibrinogen B, Sigma).

Nano-LC-MS/MS analyses from experiment II to VI were performed using an Easy-nLC system (Thermo Scientific) directly coupled to a hybrid LTQ Orbitrap Velos ETD mass spectrometer (Thermo Scientific). Peptides were separated in a 10-cm fused SilicaTip column (New Objective, Inc.) that was packed in-house with 3- $\mu$ m C18-AQ ReproSil-Pur (Dr. Maisch GmbH) using a linear gradient from 3–48% acetonitrile in 89 min at a flow rate of 300 nl/min. The MS acquisition method was comprised of one survey full scan ranging from m/z 300 to m/z 2000 acquired in the FT-Orbitrap with a resolution of R= 60'000 at m/z 400, followed by up to five data-dependent HCD MS2 scans from the top five precursor ions with a charge state  $\geq 2$  and at R=7500. For the HDAC1-centered protein network experiment the MS acquisition method was comprised of the same survey full scan and up to ten data-dependent CID MS2 scans in profile mode from the top ten precursor ions with charge state  $\geq 2$ .

### **Database searches**

Tandem mass spectra were extracted using Raw2MGF (in-house software), and the resulting mascot generic files from each lane were searched against the mouse SwissProt protein database using the Mascot Daemon 2.3.0 search engine (Matrix Science Ltd.), which was set to search the SwissProt protein database (selected for *Mus musculus*, version 2011.08) using trypsin and two missed cleavage sites. Peptide mass tolerance was set to 10 ppm and 0.05 Da for the fragment ions. Carbamidomethylation of cysteine was specified as a fixed modification, whereas oxidation of methionine and deamidation of asparagine and glutamine were defined as variable modifications. The lists of identified proteins were exported from the .dat files using the following criteria: significance threshold of 0.05, MudPit protein scoring, required red bold, and including same-set proteins. **A red bold match is the highest scoring match to a particular query listed under the highest scoring protein containing that match.**

The following criteria were used for inclusion in Supplementary Table S1 as nascent DNA bound proteins or mature DNA bound proteins: proteins present with at least one significant

protein sequence in two out of four independent experiments (two out of two in the case of NIH3T3 cells) and with a Mascot score at least 3-fold higher than the corresponding control and the corresponding pulse-chase experiment processed in parallel were considered enriched at nascent DNA. Proteins with a Mascot score at least 3-fold higher in pulse-chase than the corresponding pulse experiments were considered enriched at mature DNA.

### **System-wide analyses**

Identifiers for human orthologues were retrieved using the biological DataBase network (3). The pair-wise analysis was performed on data from several genome-wide siRNA studies (see Figure Table 1 for references). Gene ontology term enrichment was performed using the DAVID database with the total set of proteins against the entire mouse genome as the background (4). Protein interaction data were retrieved from the STRING database (5) using the protein mode. Only interactions from protein-protein interaction databases, curated databases and text-mining information were considered (confidence score >0.4). The network was visualised using Cytoscape (v2.8.3) (6).

### **SUPPLEMENTAL REFERENCES**

1. Lopez-Contreras, A.J., Ruppen, I., Nieto-Soler, M., Murga, M., Rodriguez-Acebes, S., Remeseiro, S., Rodrigo-Perez, S., Rojas, A.M., Mendez, J., Munoz, J. *et al.* (2013) A proteomic characterization of factors enriched at nascent DNA molecules. *Cell Rep*, **3**, 1105-1116.
2. Sirbu, B.M., McDonald, W.H., Dungrawala, H., Badu-Nkansah, A., Kavanaugh, G.M., Chen, Y., Tabb, D.L. and Cortez, D. (2013) Identification of Proteins at Active, Stalled, and Collapsed Replication Forks Using Isolation of Proteins on Nascent DNA (iPOND) Coupled with Mass Spectrometry. *J Biol Chem*, **288**, 31458-31467.
3. Mudunuri, U., Che, A., Yi, M. and Stephens, R.M. (2009) bioDBnet: the biological database network. *Bioinformatics*, **25**, 555-556.
4. Huang da, W., Sherman, B.T. and Lempicki, R.A. (2009) Systematic and integrative analysis of large gene lists using DAVID bioinformatics resources. *Nat Protoc*, **4**, 44-57.
5. Jensen, L.J., Kuhn, M., Stark, M., Chaffron, S., Creevey, C., Muller, J., Doerks, T., Julien, P., Roth, A., Simonovic, M. *et al.* (2009) STRING 8--a global view on proteins and their functional interactions in 630 organisms. *Nucleic Acids Res*, **37**, D412-416.

6. Smoot, M.E., Ono, K., Ruscheinski, J., Wang, P.L. and Ideker, T. (2011) Cytoscape 2.8: new features for data integration and network visualization. *Bioinformatics*, **27**, 431-432.
